# Supplementary material
Source: publisher figshare collection journal article supplement (https://tandf.figshare.com/ndownloader/files/13626755)
Supplement: Supplementary file 1 [file 13626755]

Table S1.

*Sample questions from interview guide*

| Sections and Sample Questions |
| --- |
| *Section 1: Getting to know the participant and his or her experiences* |
| - May you please tell me about your experience with physical activity programs and events for veterans with a physical disability? |
| *Section 2: Program environment* |
| - Tell me about the environment of the program/events that you offer.   - Probe questions:     - What would the physical environment look like?     - What about the social environment?   - How do you create this environment? |
| *Section 3: Relationships* |
| - Can you please describe the relationships built through your program/events….   - Between coaches/instructors and participants?   - Between participants?   - How do you build these relationships? |
| *Section 4: Participant engagement* |
| - May you please describe what a participant’s ideal involvement would look like in your program/during your event?   - How do you develop this level of involvement?   - What challenges do you face in developing this level of involvement? |
| *Section 5: Desired outcomes of participation* |
| - Thinking about your program/event, what are the short-term/long-term outcomes?   - How do you achieve these outcomes?   - What challenges do you face in achieving these outcomes? |
| *Section 6: Closing questions* |
| - Are there elements of delivering programs/events that have not been covered in our discussion? |
|  |

*Note.* Individuals involved in overall program organization were asked questions that included the word “program”, while participants involved in specific events rather than global physical activity programming (e.g. instructor for a particular activity) were asked questions using the word “event” to probe the particular event which they were involved in delivering.
